# Supplementary material for: Aerobic exercise reverses aging-induced depth-dependent decline in cerebral microcirculation
Source: eLife. 2023 Jul 4;12:e86329. doi: 10.7554/eLife.86329 (PMC10319437; doi:10.7554/eLife.86329)
Supplement: Figure 1—source data 1. [file elife-86329-fig1-data1.xlsx]

## Sheet: Sheet1
Mouse ID	Flux (RBC/s), layer II/III	Flux (RBC/s), layer IV	Flux (RBC/s), WM
youngSED1	50.7901	57.4121	58.1787
youngSED2	42.9716	42.2347	66.5057
youngSED3	50.3095	48.005	54.0702
youngSED4	54.109	60.6775	67.7587
youngSED5	45.2643	47.6821	53.144
youngSED6	49.4159	56.7563	50.686
Mouse ID	Flux (RBC/s), layer II/III	Flux (RBC/s), layer IV	Flux (RBC/s), WM
SED1	40.1185	34.2787	36.6576
SED2	45.2972	43.5205	30.1103
SED3	56.9902	57.9644	31.7454
SED4	47.1214	57.1	44.1308
SED6	42.097	58.9735	57.2616
SED7	46.6414	50.0313	45.6941
SED8	56.0724	51.9722	43.7615
Mouse ID	Flux (RBC/s), layer II/III	Flux (RBC/s), layer IV	Flux (RBC/s), WM
EX1	45.5575		59.7645
EX2	46.4183	67.4616	48.1036
EX3	45.0323	65.5741	61.2577
EX5	43.6121	52.2868	45.3319
EX6	40.756	50.3964	52.4579
EX7	46.9649	43.8578	55.779
EX8	49.6118	59.3804	76.4539
EX9	49.5009	66.2999	44.0807
