# Supplementary material for: Aerobic exercise reverses aging-induced depth-dependent decline in cerebral microcirculation
Source: eLife. 2023 Jul 4;12:e86329. doi: 10.7554/eLife.86329 (PMC10319437; doi:10.7554/eLife.86329)
Supplement: Figure 1—source data 2. [file elife-86329-fig1-data2.xlsx]

## Sheet: Sheet1
Mouse ID	CV, layer II/III	CV, layer IV	CV, WM
SED1	31.2693	20.2751	29.3819
SED2	30.2437	24.6427	21.9397
SED3	35.5717	31.4685	12.8487
SED4	25.859	37.1259	32.5428
SED6	24.9317	36.7048	26.9846
SED7	24.032	28.9197	21.8007
SED8	37.4738	37.4876	28.7817
Mouse ID	CV, layer II/III	CV, layer IV	CV, WM
EX1	28.9906		32.8908
EX2	28.4789	47.5589	19.6494
EX3	25.5917	36.3413	34.7065
EX5	25.2883	28.6993	19.8002
EX6	32.7389	30.6233	25.5222
EX7	31.4686	29.1953	30.2983
EX8	30.9559	30.4498	25.8701
EX9	37.2867	44.3433	16.5949
