# Supplementary material for: Aerobic exercise reverses aging-induced depth-dependent decline in cerebral microcirculation
Source: eLife. 2023 Jul 4;12:e86329. doi: 10.7554/eLife.86329 (PMC10319437; doi:10.7554/eLife.86329)
Supplement: Figure 1—source data 3. [file elife-86329-fig1-data3.xlsx]

## Sheet: Sheet1
Mouse ID	CBF (nl/min)
SED1	26.2937
SED2	45.9781
SED3	30.1731
SED4	39.7998
SED6	50.0012
SED7	40.9492
SED8	81.1801
SED9	61.7831
SED10	83.3353
Mouse ID	Diameter (um)
SED1	20.88
SED2	25
SED3	24.13
SED4	21.44
SED6	26.63
SED7	21.185
SED8	31.48
SED9	27.63
SED10	27.5
Mouse ID	CBF (nl/min)
EX1	72.4873
EX2	113.508
EX3	67.5303
EX5	100.577
EX7	104.888
EX8	25.8627
Mouse ID	Diameter (um)
EX1	27.625
EX2	29.5
EX3	28.5
EX5	29.26
EX7	30.12
EX8	20.63
