# Supplementary material for: Aerobic exercise reverses aging-induced depth-dependent decline in cerebral microcirculation
Source: eLife. 2023 Jul 4;12:e86329. doi: 10.7554/eLife.86329 (PMC10319437; doi:10.7554/eLife.86329)
Supplement: Figure 2—source data 1. [file elife-86329-fig2-data1.xlsx]

## Sheet: Sheet1
Mouse ID	Po2 (mmHg), layer I	Po2 (mmHg), layer II/III	Po2 (mmHg), layer IV
SED1	45.8765	49.708	46.875
SED2	44.5512	40.9148	39.9018
SED3	43.3273	48.7568	47.6786
SED4	41.3883	46.933	42.4785
SED6	41.6052	45.7325	50.9101
SED7	40.1671	47.7099	43.871
SED8	41.6444	47.5188	46.1536
SED9	41.0412	43.9115	43.5061
SED10	39.6923	44.6109	45.8843
Mouse ID	Po2 (mmHg), layer I	Po2 (mmHg), layer II/III	Po2 (mmHg), layer IV
EX1	43.6042	46.6903	50.0294
EX2	43.7432	45.6748	51.2282
EX3	51.6476	51.6233	52.8024
EX5	42.2244	49.217	49.4517
EX6	43.1178	47.0354	51.7378
EX7	43.3448	48.1767	45.4183
EX8	44.6687	48.9496	49.0238
EX9	46.5485	49.4564	50.0504
EX10	48.8413	52.4973	53.6271
