# Supplementary material for: Aerobic exercise reverses aging-induced depth-dependent decline in cerebral microcirculation
Source: eLife. 2023 Jul 4;12:e86329. doi: 10.7554/eLife.86329 (PMC10319437; doi:10.7554/eLife.86329)
Supplement: Figure 2—source data 2. [file elife-86329-fig2-data2.xlsx]

## Sheet: Sheet1
Mouse ID	HCT (%)
SED1	37.15
SED2	36.05
SED3	34.25
SED4	35.9
SED7	31.75
SED8	40.8
SED9	39.3
SED10	34.3
Mouse ID	HCT (%)
EX1	39.5
EX2	36.4
EX7	41.7
EX8	42.2
EX9	35.4
