# Supplementary material for: Aerobic exercise reverses aging-induced depth-dependent decline in cerebral microcirculation
Source: eLife. 2023 Jul 4;12:e86329. doi: 10.7554/eLife.86329 (PMC10319437; doi:10.7554/eLife.86329)
Supplement: Figure 2—source data 3. [file elife-86329-fig2-data3.xlsx]

## Sheet: Sheet1
Mouse ID	arterial Po2 (mmHg), layer I	arterial Po2 (mmHg), layer II/III	arterial Po2 (mmHg), layer IV
SED1	92.0157	88.9268	83.5895
SED2	83.2573	81.3091	75.3841
SED4	76.9616	77.7802	77.0634
SED6	82.8951	83.8365	86.6332
SED7	82.9747	80.5962	73.839
SED8	87.2513	83.2647	82.4759
SED9	94.425	86.0641	84.1068
SED10	79.7579	76.6524	77.0622
Mouse ID	venous Po2 (mmHg), layer I	venous Po2 (mmHg), layer II/III	venous Po2 (mmHg), layer IV
SED1	43.2416	42.6264	43.4996
SED2	39.3001	36.5646	37.8421
SED4	40.1274	39.2976	40.4918
SED6	45.2136	43.1308	45.8866
SED7	39.2835	43.7331	41.4864
SED8	42.7336	42.98	41.4649
SED9	43.7494	39.1344	42.8154
SED10	43.1956	41.61	40.6702
Mouse ID	arterial Po2 (mmHg), layer I	arterial Po2 (mmHg), layer II/III	arterial Po2 (mmHg), layer IV
EX1	83.9605	82.0808	82.1638
EX2	92.6113	85.7916	82.0567
EX3	90.1002	86.9881	85.678
EX5	87.14	87.0436	81.9589
EX6	85.2908	84.7339	81.5472
EX7	92.6725	81.5787	78.2342
EX8	94.0705	88.9762	89.285
EX9	90.0543	84.913
EX10	92.6	95.3996	94.2046
Mouse ID	venous Po2 (mmHg), layer I	venous Po2 (mmHg), layer II/III	venous Po2 (mmHg), layer IV
EX1	36.0432	40.9154	43.0299
EX2	44.9235	41.8352	42.5204
EX3	45.4057	44.9095	45.3708
EX5	42.1198	43.0772	45.3648
EX6	41.75	42.7574	44.8782
EX7	39.4221	39.0102	42.1926
EX8	41.6126	40.9384	42.2025
EX9	47.4299	47.2199	46.8
EX10	43.86	42.0107	46.2351
Mouse ID	arterial So2 (mmHg), layer I	arterial So2 (mmHg), layer II/III	arterial So2 (mmHg), layer IV
SED1	89.5178	88.6585	86.944
SED2	86.8264	86.109	83.5952
SED4	84.3176	84.6765	84.3628
SED6	86.6967	87.0305	87.96
SED7	86.7254	85.8339	82.8463
SED8	88.1536	86.8291	86.5446
SED9	90.1295	87.778	87.1243
SED10	85.5014	84.1792	84.3623
Mouse ID	venous So2 (mmHg), layer I	venous So2 (mmHg), layer II/III	venous So2 (mmHg), layer IV
SED1	54.7087	53.7875	55.0902
SED2	48.5345	43.8932	46.0942
SED4	49.8829	48.5304	50.4683
SED6	57.5519	54.5439	58.4839
SED7	48.5072	55.4328	52.0384
SED8	53.9492	54.3189	52.0049
SED9	55.4568	48.2612	54.0722
SED10	54.6403	52.2307	50.753
Mouse ID	arterial So2 (mmHg), layer I	arterial So2 (mmHg), layer II/III	arterial So2 (mmHg), layer IV
EX1	87.0736	86.3991	86.4298
EX2	89.6736	87.6896	86.3901
EX3	88.9954	88.0716	87.6525
EX5	88.119	88.089	86.3538
EX6	87.525	87.3385	86.1994
EX7	89.6894	86.2112	84.8711
EX8	90.0425	88.6729	88.7627
EX9	88.9825	87.3989
EX10	89.6706	90.3636	90.0756
Mouse ID	venous So2 (mmHg), layer I	venous So2 (mmHg), layer II/III	venous So2 (mmHg), layer IV
EX1	42.9793	51.142	54.3935
EX2	57.1442	52.5793	53.6271
EX3	57.8199	57.1244	57.7714
EX5	53.017	54.4641	57.7631
EX6	52.4477	53.985	57.0802
EX7	48.735	48.0557	53.1284
EX8	52.2347	51.1783	53.1436
EX9	60.5479	60.2731	59.7179
EX10	55.6182	52.8496	58.959
