# Supplementary material for: Aerobic exercise reverses aging-induced depth-dependent decline in cerebral microcirculation
Source: eLife. 2023 Jul 4;12:e86329. doi: 10.7554/eLife.86329 (PMC10319437; doi:10.7554/eLife.86329)
Supplement: Figure 3—source data 1. [file elife-86329-fig3-data1.xlsx]

## Sheet: Sheet1
Mouse ID	Peak Response Amplitude (%)
SED1	0.96
SED2	2.54
SED3	1.5
SED4	2.37
SED6	3.54
SED7	2.33
SED8	2.1
SED9	2.37
SED10	3.12
Mouse ID	Peak Response Amplitude (%)
EX1	2.05
EX2	2.98
EX3	2.12
EX6	2.04
EX7	1.86
EX8	1.98
EX9	1.79
EX10	1.95
Mouse ID	Peak Response Amplitude (%)
YoungerSED1	4.78
YoungerSED2	4.33
YoungerSED3	5.02
YoungerSED4	2.98
YoungerSED5	3.17
YoungerSED6	4.34
YoungerSED7	4.12
YoungerSED8	5.17
