# Supplementary material for: Aerobic exercise reverses aging-induced depth-dependent decline in cerebral microcirculation
Source: eLife. 2023 Jul 4;12:e86329. doi: 10.7554/eLife.86329 (PMC10319437; doi:10.7554/eLife.86329)
Supplement: Figure 4—source data 1. [file elife-86329-fig4-data1.xlsx]

## Sheet: Sheet1
Mouse ID	Vessel Segment Density (1e4/mm3)
YoungSED1	4.15
YoungSED2	4.19
YoungSED3	4
YoungSED4	4.84
YoungSED5	4.78
Mouse ID	Vessel Segment Density (1e4/mm3)
SED1	3.72
SED2	2.78
SED3	3.17
SED4	3.71
SED6	2.7
SED7	2.95
SED8	3.13
SED9	3.38
SED10	2.98
Mouse ID	Vessel Segment Density (1e4/mm3)
EX1	4.15
EX2	3.81
EX3	3.35
EX5	4.15
EX6	4.66
EX7	4.55
EX8	3.83
EX9	4.41
Mouse ID	Vessel Length Density (1e3/mm2)
YoungSED1	1.36
YoungSED2	1.43
YoungSED3	1.39
YoungSED4	1.56
YoungSED5	1.52
Mouse ID	Vessel Length Density (1e3/mm2)
SED1	1.42
SED2	1.05
SED3	1.19
SED4	1.36
SED6	0.95
SED7	1.14
SED8	1.27
SED9	1.2
SED10	1.25
Mouse ID	Vessel Length Density (1e3/mm2)
EX1	1.43
EX2	1.41
EX3	1.3
EX5	1.37
EX6	1.55
EX7	1.46
EX8	1.32
EX9	1.52
