# Supplementary material for: Aerobic exercise reverses aging-induced depth-dependent decline in cerebral microcirculation
Source: eLife. 2023 Jul 4;12:e86329. doi: 10.7554/eLife.86329 (PMC10319437; doi:10.7554/eLife.86329)
Supplement: Figure 5—source data 1. [file elife-86329-fig5-data1.xlsx]

## Sheet: Sheet1
Mouse ID	DI1	DI2	DI3	DI4
SED1	-0.0164319	0.0224719	-0.0107962	0.0518893
SED2	0.135272	0.157353	0.147823	0.104226
SED3	0.26259	0.20892	0.232061	0.190262
SED4	-0.0968883	0.0352349	0.198419	0.139267
SED6	-0.0196409	-0.122404	-0.0280957	0.0360253
SED7	0.100592	0.224698	0.233513	0.191416
SED8	-0.151685	-0.15362	-0.185613	-0.0665695
SED9	0.239919	0.261583	0.222892	0.17696
SED10	-0.28672	-0.249551	-0.273171	-0.243857
Mouse ID	DI1	DI2	DI3	DI4
EX1	0.352798	0.354167	0.25657	0.264414
EX2	0.219512	0.0825613	0.0565577	0.0666317
EX3	0.363109	0.278431	0.158375	0.194013
EX7	0.308777	0.294949	0.315956	0.22446
EX8	0.0949367	0.0430303	0.0301775	0.0758408
EX9	-0.16235	-0.0428219	-0.0818354	-0.0531511
EX10	0.442396	0.442396	0.358561	0.29502
Mouse ID	Alteration (%)
SED1	72.22
SED2	58.33
SED3	70
SED4	62.96
SED6	61.11
SED7	42.86
SED8	60
SED9	53.57
SED10	60.61
Mouse ID	Alteration (%)
EX1	61.54
EX2	70
EX3	69.7
EX7	52.38
EX8	59.26
EX9	50
EX10	63.16
